# Supplementary material
Source: Springer Nature journal article supplement (https://www.springerprofessional.de/resource/supplementary/13638_2012_649_MOESM1_ESM.pdf/11898724)

Primary User

Primary Receiver

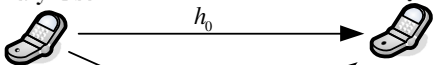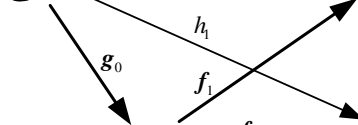

$g_0$

$f_1$

$f_0$

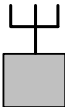

Secondary Receiver

Secondary User

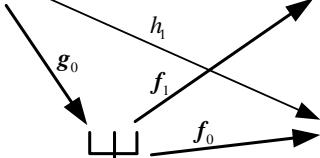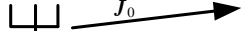

Supplement: MOESM1 [file 11898724]
